# Supplementary material for: Enzymatic hydrolysis is limited by biomass–water interactions at high-solids: improved performance through substrate modifications
Source: PubMed Central journal article supplement (PMC6318902; doi:10.1186/s13068-018-1339-x), 2019-01-04
Supplement: 13068_2018_1339_MOESM1_ESM.pdf [file 13068_2018_1339_MOESM1_ESM.pdf]

## Additional file 1

**Table S1: LF-NMR relaxometry data for pretreated materials, modified materials, and Avicel.**

| Substrate | DM % | mono-component<br>T <sub>2</sub> time, ms | Peak 1                  |                 | Peak 2                  |                 | Peak 3                  |                 | Peak 4                  |                 | Peak 5                  |                 | Peak 6                  |                 | Peak 7                  |                 |
|-----------|------|-------------------------------------------|-------------------------|-----------------|-------------------------|-----------------|-------------------------|-----------------|-------------------------|-----------------|-------------------------|-----------------|-------------------------|-----------------|-------------------------|-----------------|
|           |      |                                           | T <sub>2</sub> time, ms | % water in peak | T <sub>2</sub> time, ms | % water in peak | T <sub>2</sub> time, ms | % water in peak | T <sub>2</sub> time, ms | % water in peak | T <sub>2</sub> time, ms | % water in peak | T <sub>2</sub> time, ms | % water in peak | T <sub>2</sub> time, ms | % water in peak |
| PS        | 5    | 1,350                                     |                         |                 | 10                      | 2%              | 48                      | 8%              | 353                     | 17%             | 1550                    | 74%             |                         |                 |                         |                 |
|           | 10   | 731                                       |                         |                 | 7                       | 1%              | 41                      | 17%             | 233                     | 24%             | 965                     | 57%             |                         |                 |                         |                 |
|           | 12   | 624                                       |                         |                 | 14                      | 1%              | 44                      | 11%             | 232                     | 22%             | 767                     | 66%             |                         |                 |                         |                 |
|           | 15   | 445                                       | 5.1                     | 0.3%            | -                       |                 | 33                      | 8%              | 179                     | 23%             | 533                     | 69%             |                         |                 |                         |                 |
|           | 16.5 | 307                                       | 2.5                     | 0.3%            | -                       |                 | 30                      | 10%             | 160                     | 32%             | 411                     | 58%             |                         |                 |                         |                 |
|           | 18   | 62                                        | 5.3                     | 1.0%            | 19                      | 10%             | 55                      | 76%             | 166                     | 13%             |                         |                 |                         |                 |                         |                 |
|           | 21   | 55                                        | 3.3                     | 0.4%            | 14                      | 6%              | 46                      | 76%             | 106                     | 17%             |                         |                 |                         |                 |                         |                 |
|           | 24   | 40                                        | 2.2                     | 0.9%            | 15                      | 17%             | 40                      | 71%             | 52                      | 11%             |                         |                 |                         |                 |                         |                 |
|           | 27   | 34                                        | 4.5                     | 2.5%            | 12                      | 8%              | 30                      | 90%             | 76                      | 7%              |                         |                 |                         |                 |                         |                 |
|           | 30   | 27                                        | 5.0                     | 1.4%            | 11                      | 9%              | 26                      | 93%             | 18                      | 7%              |                         |                 |                         |                 |                         |                 |
| PWS       | 5    | 1,043                                     | 8                       | 1.3%            | -                       |                 | 38                      | 4%              | -                       |                 | 198                     | 18%             | 1,160                   | 77%             |                         |                 |
|           | 7.5  | 1,082                                     | 4                       | 1%              | 20                      | 3.2%            | -                       |                 | 74                      | 8%              | 315                     | 33%             | 1,512                   | 54%             |                         |                 |
|           | 10   | 986                                       | 4                       | 0.9%            | 13                      | 2.9%            | 35                      | 7%              | 60                      | 8%              | 231                     | 34%             | 1,052                   | 57%             |                         |                 |
|           | 12   | 118                                       | 4                       | 1.5%            | 20                      | 12%             | -                       |                 | 79                      | 55%             | 217                     | 31%             | -                       |                 |                         |                 |
|           | 15   | 81                                        | 3                       | 1.2%            | 13                      | 7.2%            | -                       |                 | 52                      | 54%             | 131                     | 37%             | -                       |                 |                         |                 |
|           | 16.5 | 91                                        | 4                       | 0.9%            | 16                      | 12.7%           | -                       |                 | 60                      | 55%             | 171                     | 31%             | -                       |                 |                         |                 |
|           | 18   | 63                                        | 5                       | 3.8%            | 12                      | 7.0%            | -                       |                 | 40                      | 45%             | 89                      | 44%             |                         |                 |                         |                 |
|           | 21   | 48                                        | 7                       | 5.9%            | -                       |                 | -                       |                 | 28                      | 47%             | 69                      | 47%             | -                       |                 |                         |                 |
|           | 24   | 38                                        | 4                       | 3.1%            | -                       |                 | -                       |                 | 19                      | 37%             | 49                      | 60%             | -                       |                 |                         |                 |
|           | 27   | 31                                        | 3                       | 2.4%            | -                       |                 | -                       |                 | 14                      | 31%             | 39                      | 66%             | -                       |                 |                         |                 |
| 30        | 23   | 2                                         | 1.9%                    | -               |                         | -               |                         | 11              | 28%                     | 27              | 71%                     | -               |                         |                 |                         |                 |

|                         |      |      |      |       |   |       |    |    |     |      |     |      |     |      |       |     |
|-------------------------|------|------|------|-------|---|-------|----|----|-----|------|-----|------|-----|------|-------|-----|
| <b>PWS milled</b>       | 5    | 833  | -    | 0.0 % | 3 | 0.4 % | 10 | 3% | 32  | 7%   | 212 | 21 % | 974 | 69 % |       |     |
|                         | 7.5  | 491  | 0.8  | 0.7 % | 3 | 0.6 % | 13 | 7% | 39  | 10 % | 180 | 29 % | 677 | 53 % |       |     |
|                         | 10   | 264  | 0.5  | 0.9 % | 8 | 4.2 % | -  |    | 26  | 15 % | 136 | 37 % | 405 | 43 % |       |     |
|                         | 12   | 147  | 0.4  | 0.5 % | 3 | 1.2 % | -  |    | 17  | 16 % | 69  | 30 % | 206 | 52 % |       |     |
|                         | 15   | 107  | 0.4  | 1.0 % | 3 | 0.7 % | -  |    | 15  | 16 % | 50  | 34 % | 159 | 49 % |       |     |
|                         | 16.5 | 85   | 0.2  | 1.0 % | 1 | 0.9 % | -  |    | 11  | 12 % | 36  | 35 % | 122 | 51 % |       |     |
|                         | 18   | 76   | 0.1  | 0.9 % | 1 | 0.7 % | -  |    | 10  | 10 % | 33  | 38 % | 110 | 50 % |       |     |
|                         | 21   | 50   | 0.7  | 0.9 % | 6 | 0.9 % | -  |    | 6   | 5%   | 22  | 43 % | 72  | 50 % |       |     |
|                         | 24   | 38   | 0.4  | 1.1 % | 3 |       | -  |    | 3   | 3%   | 17  | 44 % | 52  | 52 % |       |     |
|                         | 27   | 30   | 0.3  | 1.3 % | 2 |       | -  |    | 2   | 2%   | 13  | 42 % | 40  | 55 % |       |     |
|                         | 30   | 22   | 0.5  | 2.2 % | 1 |       | -  |    | 1   | 2%   | 10  | 35 % | 27  | 63 % |       |     |
|                         |      |      |      |       |   |       |    |    |     |      |     |      |     |      |       |     |
| <b>PWS de-lignified</b> | 5    | 382  | 1.07 | 0.5 % | 7 | 0.7 % | 30 | 3% | 102 | 8%   | 321 | 73 % | 865 | 16 % |       |     |
|                         | 7.5  | 206  | 0.35 | 0.2 % | 5 | 0.9 % | 26 | 5% | 90  | 29 % | 219 | 54 % | 524 | 18 % |       |     |
|                         | 10   | 186  | 0.56 | 0.5 % | 5 | 0.7 % | 20 | 4% | 66  | 21 % | 167 | 57 % | 446 | 18 % |       |     |
|                         | 12.0 | 145  | 0.88 | 0.2 % | 2 | 0.4 % | 11 | 2% | 39  | 16 % | 112 | 55 % | 302 | 27 % |       |     |
|                         | 15   | 98   | 0.16 | 1.2 % | 3 | 1.0 % | 8  | 1% | 25  | 14 % | 69  | 55 % | 188 | 28 % |       |     |
|                         | 16.5 | 95   | -    |       | 3 | 1.1 % | 15 | 7% | 28  | 23 % | 79  | 50 % | 226 | 24 % |       |     |
|                         | 18   | 86   | 0.29 | 0.7 % | 2 | 0.9 % | -  |    | 12  | 5%   | 42  | 47 % | 112 | 40 % |       |     |
|                         | 21   | 61   | 0.49 | 1.5 % | 3 | 1.1 % | -  |    | 16  | 15 % | 45  | 51 % | 124 | 31 % |       |     |
|                         | 24   | 41   | 0.24 | 0.5 % | 3 | 1.8 % | -  |    | -   |      | 20  | 36 % | 52  | 62 % |       |     |
|                         | 27   | 27   | 0.59 | 1.4 % | - |       | -  |    | -   |      | 11  | 19 % | 30  | 80 % |       |     |
|                         | 30   | 20   | 0.63 | 1.3 % | 1 | 1.8 % | -  |    | -   |      | 9   | 31 % | 24  | 67 % |       |     |
|                         |      |      |      |       |   |       |    |    |     |      |     |      |     |      |       |     |
| <b>PWS xylanase</b>     | 5    | 2384 | -    |       | 6 | 1.4 % | 25 | 5% | 69  | 9%   | 171 | 25 % | 424 | 13 % | 3,262 | 47% |
|                         | 7.5  | 805  | -    |       | 6 | 1.7 % | 28 | 7% | 47  | 10 % | 138 | 48 % | 354 | 18 % | 2,833 | 21% |
|                         | 10   | 200  | -    |       | 4 | 1.1 % | 14 | 3% | 42  | 13 % | 116 | 49 % | 260 | 26 % | 1,754 | 8%  |
|                         | 12   | 122  | 0.19 | 1%    | 5 | 1.5 % | 16 | 4% | 41  | 17 % | 109 | 60 % | 262 | 16 % | -     |     |
|                         | 15   | 94   | 0.61 | 1%    | 3 | 1.1 % | -  |    | 16  | 9%   | 56  | 46 % | 145 | 44 % | -     |     |
|                         | 16.5 | 80   | 0.56 | 1%    | 5 | 1.6 % | 7  | 2% | 27  | 20 % | 74  | 62 % | 208 | 14 % | -     |     |
|                         | 18   | 67   | 0.76 | 1%    | 4 | 0.9 % | 7  | 1% | 18  | 12 % | 52  | 59 % | 123 | 27 % | -     |     |
|                         | 21   | 60   | 0.36 | 1%    | 3 | 0.8 % | 5  | 2% | 20  | 20 % | 54  | 62 % | 142 | 15 % | -     | -   |
|                         | 24   | 48   | 0.49 | 1%    | 5 | 2.2 % | -  |    | 18  | 24 % | 44  | 56 % | 141 | 17 % | -     | -   |
|                         | 27   | 37   | 0.36 | 1%    | 2 | 0.9 % | 3  | 2% | 13  | 15 % | 33  | 69 % | 89  | 13 % | -     | -   |

|        |      |       |      |    |    |      |    |     |     |     |     |     |       |     |   |   |
|--------|------|-------|------|----|----|------|----|-----|-----|-----|-----|-----|-------|-----|---|---|
|        |      |       |      |    |    | %    |    |     |     | %   |     | %   |       | %   |   |   |
|        | 30   | 31    | 0.20 | 1% | 2  | 2.1% | 6  | 6%  | -   |     | 19  | 59% | 51    | 36% | - | - |
| Avicel | 5    | 3,918 | 6    | 1% | 17 | 2%   | -  |     | 95  | 13% | 354 | 1%  | 4,060 | 83% |   |   |
|        | 7.5  | 3,719 | 6    | 2% | 22 | 2%   | -  |     | 98  | 21% | 343 | 2%  | 3,952 | 74% |   |   |
|        | 10   | 3,539 | 4    | 1% | 16 | 3%   | 38 | 3%  | 109 | 31% | 282 | 4%  | 3,951 | 60% |   |   |
|        | 12   | 3,395 | 6    | 3% | 28 | 5%   | -  |     | 104 | 35% | 286 | 4%  | 3,898 | 53% |   |   |
|        | 15   | 3,110 | 6    | 3% | 27 | 7%   | -  |     | 101 | 43% | 282 | 6%  | 3,862 | 41% |   |   |
|        | 16.5 | 2,752 | 3    | 1% | 12 | 6%   | 42 | 7%  | 107 | 47% | 316 | 7%  | 3,757 | 32% |   |   |
|        | 18   | 1,971 | 10   | 4% | 34 | 7%   | -  |     | 100 | 49% | 230 | 15% | 3,576 | 23% |   |   |
|        | 21   | 1,682 | 3    | 2% | 13 | 7%   | 25 | 4%  | 76  | 51% | 179 | 19% | 3,536 | 19% |   |   |
|        | 24   | NR    | NR   | NR | NR | NR   | NR | NR  | NR  | NR  | NR  | NR  | NR    | NR  |   |   |
|        | 27   | 83    | 5    | 2% | 19 | 8%   | -  | 15% | 55  | 38% | 117 | 44% | 893   | 3%  |   |   |
|        | 30   | 63    | 6    | 6% | 13 | 10%  | -  | 22% | 67  | 75% |     | 1%  |       | 0%  |   |   |

**Legend: T<sub>2</sub> times of major peaks and relative amount of water in each peak for pretreated and modified materials measured at different % DM. Calculated from the areas of each peak relative to total under peak area, after NNLS analysis of the T<sub>2</sub> decay curves. T<sub>2</sub> times are reported as the T<sub>2</sub> time at maximum peak height. Data represents the average of triplicate samples. Peak number is arbitrary, and defined as the peak with the fastest T<sub>2</sub> relaxation time being peak 1, and increasing in peak number from there. Peak numbers between different substrates are not comparable, as some substrates and samples have more or fewer peaks. This data is represented in Figures 2 and 5 in the manuscript. NR stands for not recorded.**
